# Supplementary material
Source: publisher site journal article supplement (http://www.degruyter.com/publication/journal_key/JPLR/downloadAsset/JPLR_JPLR_Instruction%20for%20Authors.pdf)
Supplement: Supplementary file 1 [file JPLR_JPLR_Instruction%20for%20Authors.pdf]

# Journal of Politeness Research

## Instructions for Authors

### 1. Submitting an article for publication

Manuscripts should be submitted online to:  
<http://mc.manuscriptcentral.com/jplr>

Manuscripts of articles should be in English. Authors whose native language is not English are asked to have their article carefully checked by a native speaker.

Unless there is a very good reason, submissions of original articles should normally be no longer than 8000 words (main body) and book reviews no longer than 2000 words, but the journal will consider submissions of texts of any length and type (e.g. review articles, short opinion pieces, debates, transcribed interviews, letters to the editor).

Authors may submit an abstract in their native language as well as in English.

### 2. Peer review

Please remove from your manuscript all references to author(s) names including self-citations and other identifying details. The journal operates a double-blind peer review that usually takes four months. Submissions are sent to 2 reviewers.

### 3. Formatting and style

Once accepted for publication, the author(s) will be required to submit the final version **electronically** conforming to journal style. Please see the [De Gruyter Mouton journal style sheet](#) for details regarding journal style. If possible, a common wordprocessing program such as WORD should be used. The Editor-in-Chief reserves the right to reject any articles that do not conform to the requirements.

### 4. Permissions

Copies of any letters granting permission to reproduce illustrations or tables from other sources, or lengthy quoted passages, must be included with the manuscript.

### 5. Proofs

Authors are asked to check their manuscripts *very carefully* before submitting them in order to prevent delays and extra costs at proofing. Authors will receive PDF proofs for correction which must be returned by dates given in the publication schedule.
